# Supplementary material for: Population Structure and Genetic Diversity in the Natural Distribution of Neolamarckia cadamba in China
Source: MDPI journal article supplement (doi:10.3390/genes14040855), 2023-03-31
Supplement: s1 [file s1]

# Supplementary Materials

**Table S1.** Thirteen pairs of primers from mitochondrial DNA tested in *Neolamarkia cadamba*

| Primer pair        | Forward and reverse primer sequences              | Annealing temperature (°C) |
|--------------------|---------------------------------------------------|----------------------------|
| <i>cox3f/r</i>     | CCGTAGGAGGTGTGATGT<br>CTCCCCACCAATAGATAGAG        | 55                         |
| <i>nad2-1/2-2</i>  | AATGTGGGTTGGCTCAG<br>TGGTTATTAGATAACCGAAG         | 62                         |
| <i>orf25/nad4L</i> | CTGTYTTTTTCGCACTTAGGC<br>GTCCGRGGTACTATTGCTGT     | 55                         |
| <i>nad6f/r</i>     | TGAGTGGGTCWGTCTGCCTC<br>TGATACTTTCTGTTTTGTCG      | 58                         |
| <i>nad9f/r</i>     | GGTCATCTCAATGGGYTCAG<br>TATAGTTGGGAGACTTTACC      | 52                         |
| <i>orf25f/r</i>    | AAGACCRCCAAGCYTCTCG<br>TTGCTGCTATTCTATCTATT       | 50                         |
| <i>rps12/nad3</i>  | TTTCTTCTCTACCATGACGA<br>TGATCCYACTCGGTSTTCCT      | 55                         |
| <i>rps4f/r</i>     | CSTTTCYGCTCCGAAGAG<br>TCTCCGAAGATTGAGG            | 58                         |
| <i>nad7-1/7-2</i>  | ACCTCAACATCCTGCTGCTC<br>CGATCAGAATAAGGTAAAGC      | 47                         |
| <i>nad7-2/7-3</i>  | GCTTTACCTTATTCTGATCG<br>TGTTCTTGGGCCATCATAGA      | 57                         |
| <i>nad1-2/1-3</i>  | GCATTACGATCTGCAGCTCA<br>GGAAGCCGATTAGTTTCTGC      | 56                         |
| <i>F1/R1</i>       | GAACATGGATTAGCATTATGTC<br>ATGCTAAGAGAGGGATGCTTCGC | 58                         |
| <i>F2/R2</i>       | TATAGGGTCCGCTTACTTTGA<br>AACCGGGTAAGATGCTAAGAG    | 53                         |

**Table S2:** One hundred and sixty-one samples of mitochondrial sequences of *N. cadamba*. Each sample was a concatenated sequence of F1-R1 and F2-R2 segments.

**Table S3:** Two hundred and thirty-nine samples of nrDNA ITS alignment sequences of *N. cadamba*
